# Supplementary material for: Differential Serum Levels of CACNA1C, Circadian Rhythm and Stress Response Molecules in Subjects with Bipolar Disorder: Associations with Genetic and Clinical Factors
Source: PubMed Central journal article supplement — medRxiv. 2024 Apr 12:2024.04.11.24305678. Preprint. [Version 1] doi: 10.1101/2024.04.11.24305678 (PMC11030295; doi:10.1101/2024.04.11.24305678), 2024-04-12
Supplement: media-1.pdf [file media-1.pdf]

**Supp Table 1.** Protein levels

| Characteristics      | BD (N=100)                              |  | Control (N=100)                         | Difference<br>(Mean 95% CI) | P      |
|----------------------|-----------------------------------------|--|-----------------------------------------|-----------------------------|--------|
|                      | N (%) or Mean (SD) [Median (IQR)]       |  |                                         |                             |        |
| Age                  | 46.9 (13.1)                             |  | 46.7 (13.1)                             | 0.179 (-0.280, 0.637)       | 0.442  |
| Gender               |                                         |  |                                         |                             | NA     |
| Female               | 62 (62%)                                |  | 62 (62%)                                | NA                          |        |
| Male                 | 38 (38%)                                |  | 38 (38%)                                | NA                          |        |
| Venipuncture time, h | 12.1 (2.1)                              |  | 12.1 (2.1)                              | 0.000 (-0.001, 0.001)       | 0.783  |
| Proteins             |                                         |  |                                         |                             |        |
| SST <sup>a</sup>     | 25.1 (5.8)<br>[23.5 (22.9, 25.7)]       |  | 21.5 (7.5)<br>[23.9 (19.7, 25.5)]       | 3.6 (1.7, 5.5)              | <0.001 |
| CACNA1C <sup>b</sup> | 0.395 (0.011)<br>[0.392 (0.388, 0.396)] |  | 0.363 (0.094)<br>[0.389 (0.354, 0.399)] | 0.032 (0.013, 0.051)        | 0.001  |
| ARNTL <sup>b</sup>   | 0.528 (0.068)<br>[0.499 (0.480, 0.597)] |  | 0.555 (0.092)<br>[0.510 (0.487, 0.644)] | -0.027 (-0.051, -0.003)     | 0.029  |
| CRH <sup>b</sup>     | 6.24 (1.54)<br>[6.58 (5.09, 6.89)]      |  | 8.65 (1.36)<br>[8.56 (7.81, 9.38)]      | -2.41 (-2.79, -2.04)        | <0.001 |
| PER2 <sup>d</sup>    | 38.0 (30.5)<br>[28.4 (17.2, 53.6)]      |  | 31.3 (23.7)<br>[25.2 (14.3, 42.8)]      | 6.7 (-1.4, 14.7)            | 0.103  |

p-values calculated from paired t-tests.

<sup>a</sup>N=96 pairs because missing data from n=4 pairs.

<sup>b</sup>N=98 pairs because missing data from n=2 pairs.

<sup>d</sup>N=95 pairs because missing data from n=5 pairs.

**Supp Table 2.** Clinical characteristics

| Characteristics                 | BD (N=100)<br>N (%) or Median (IQR) |
|---------------------------------|-------------------------------------|
| Diagnosis <sup>a</sup>          |                                     |
| BD I                            | 58 (62%)                            |
| BD II                           | 36 (38%)                            |
| Alcohol dependence <sup>b</sup> | 36 (37%)                            |
| Hx psychosis                    | 19 (19%)                            |
| Hx suicide attempt              | 38 (38%)                            |
| Current episode <sup>c</sup>    |                                     |
| Manic or hypomanic              | 11 (13%)                            |
| Major depressive                | 45 (53%)                            |
| Euthymic                        | 29 (34%)                            |

| Characteristics                   | BD (N=100)<br>N (%) or Median (IQR) |
|-----------------------------------|-------------------------------------|
| Rapid cycling <sup>d</sup>        | 36 (67%)                            |
| CGI Scale <sup>e</sup>            |                                     |
| Mania                             | 2.0 (1.0, 3.0)                      |
| Depression                        | 3.0 (1.0, 4.0)                      |
| Chronotype <sup>f</sup>           |                                     |
| Non evening type                  | 65 (68%)                            |
| An evening type                   | 30 (32%)                            |
| Insomnia severity <sup>g</sup>    | 2.0 (2.0, 3.0)                      |
| Lithium (current)                 | 23 (23%)                            |
| Lithium Alda A score <sup>h</sup> | 6.0 (3.5, 7.0)                      |

Abbreviations: BD, bipolar disorder; CGI, Clinical Global Impressions

<sup>a</sup>N=94 because missing data from n=6.

<sup>b</sup>N=97 because missing data from n=3.

<sup>c</sup>N=85 because missing data from n=15.

<sup>d</sup>N=54 because missing data from n=46.

<sup>e</sup>N=96 because missing data from n=4.

<sup>f</sup>N=95 because missing data from n=5.

<sup>g</sup>N=51 because missing data from n=49. Insomnia severity is calculated as the maximum insomnia severity score [0-3] across sleep onset, mid-nocturnal, and early morning.

<sup>h</sup>N=43 because missing data from n=57.
